# Supplementary material
Source: MDPI journal article supplement (https://www.mdpi.com/2218-0532/90/2/30)
Supplement: s1 [file s1]

## Supplementary Figures

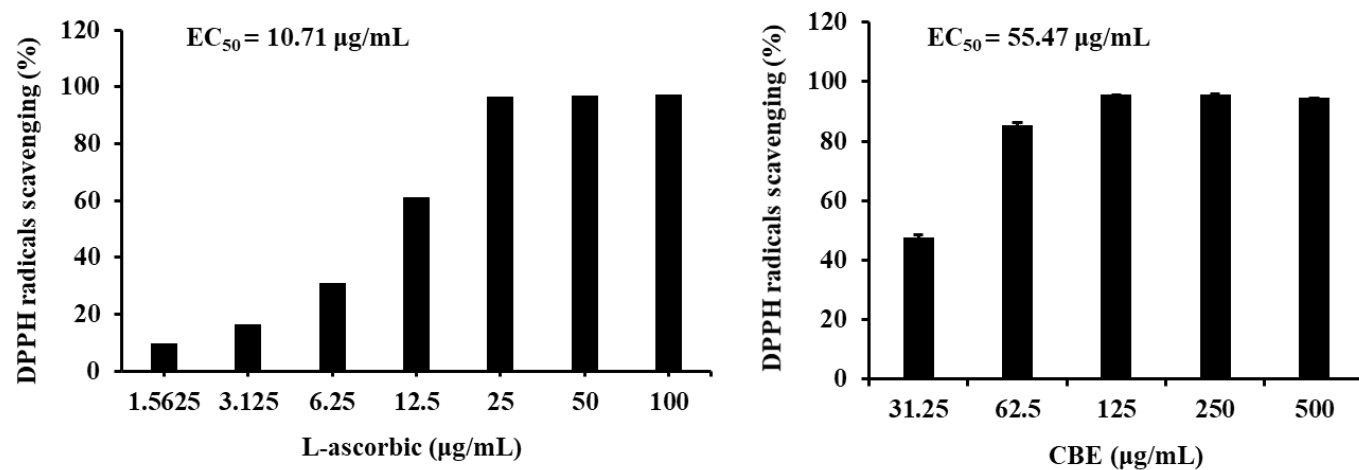

Figure S1. DPPH-free radical scavenging (%) of L-ascorbic acid and the CBE.

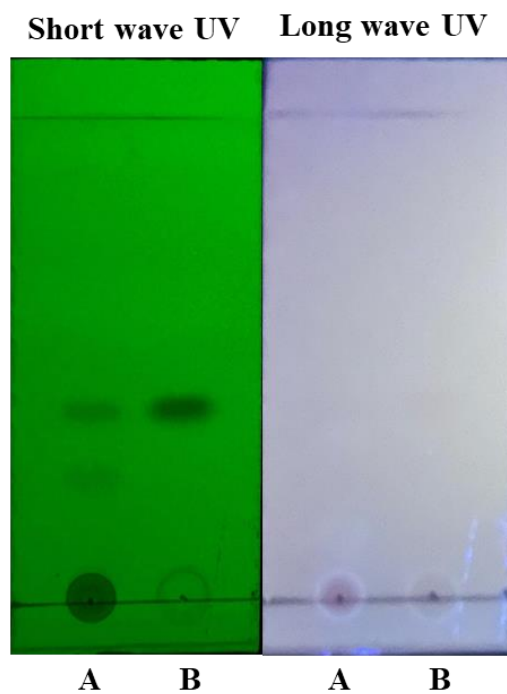

Figure S2. TLC chromatogram of CBE (lane A) and cinnamaldehyde (lane B).

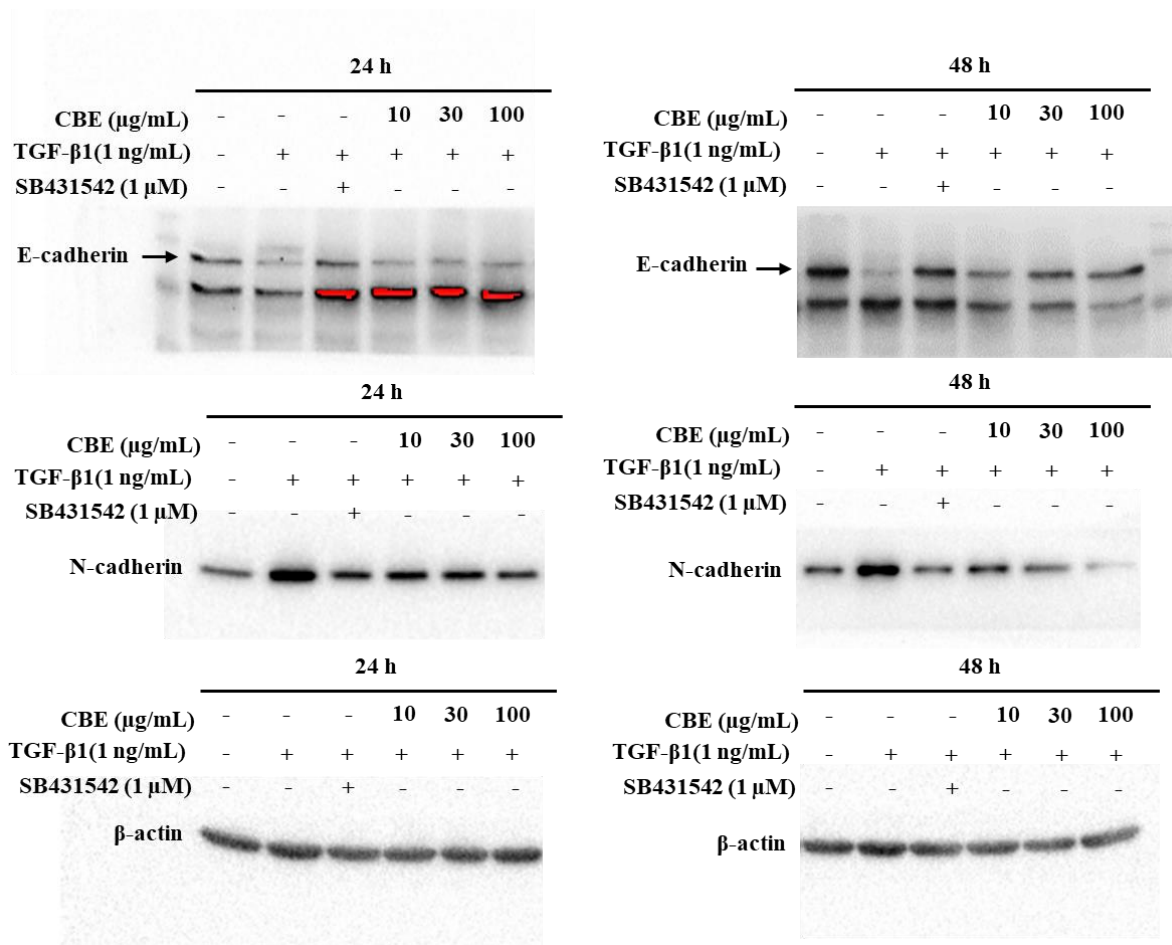

**Figure S3.** Original images of Western blot band intensities in Figure 4A.

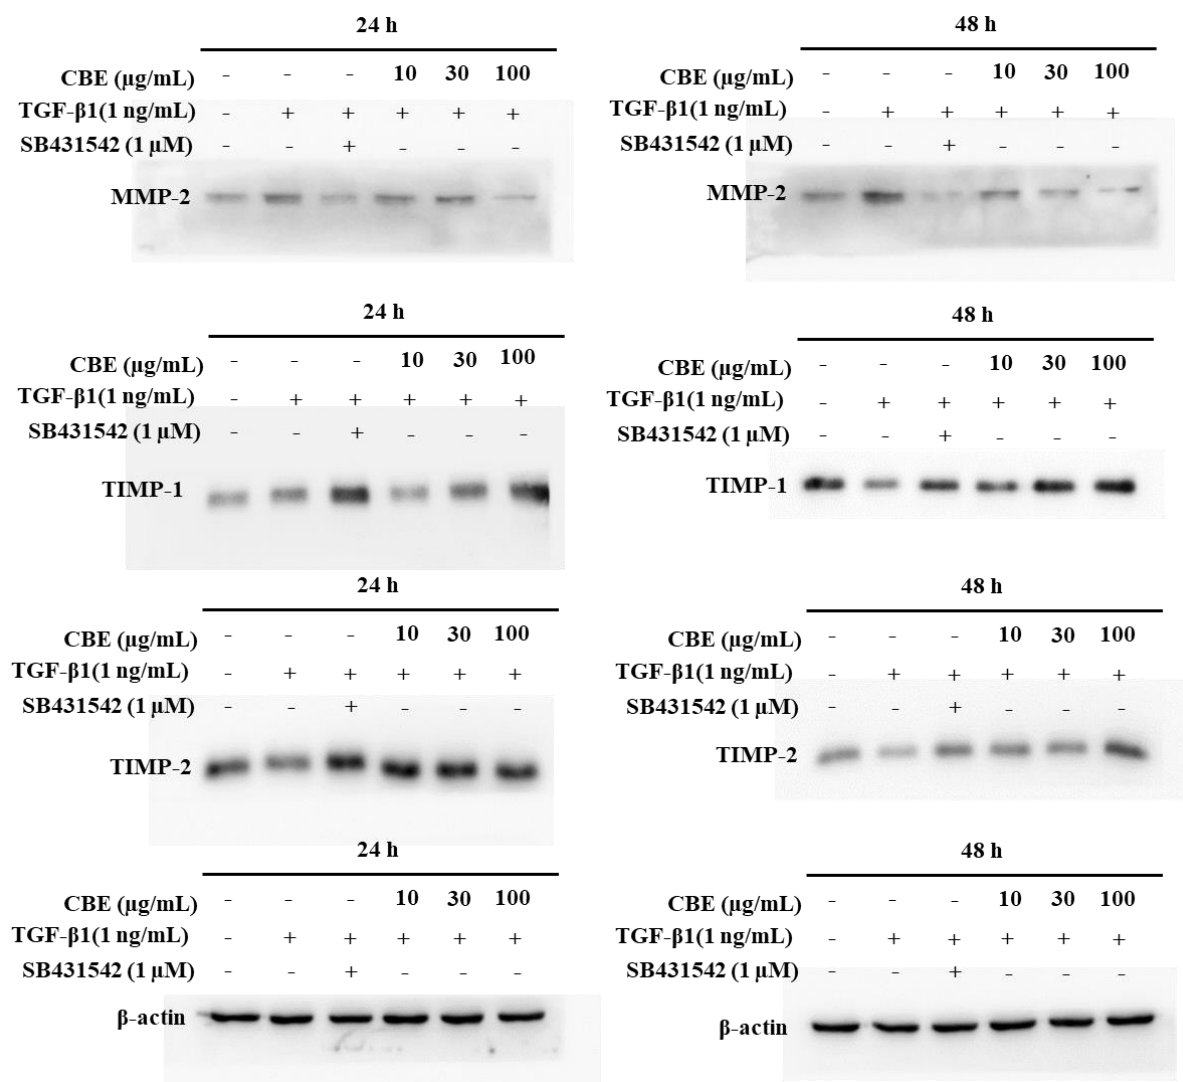

**Figure S4.** Original images of Western blot band intensities in Figure 4C.

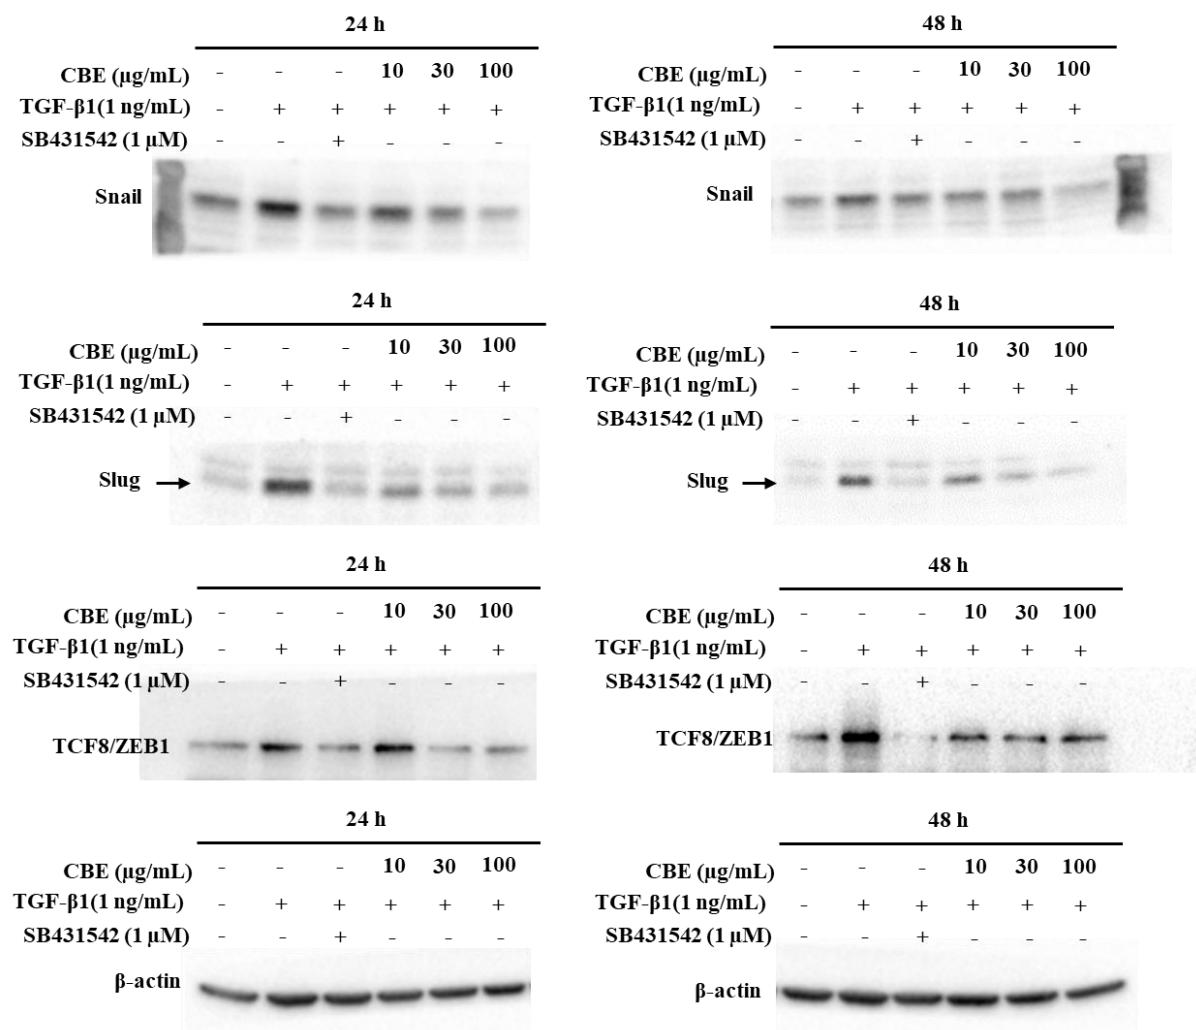

**Figure S5.** Original images of Western blot band intensities in Figure 5A.

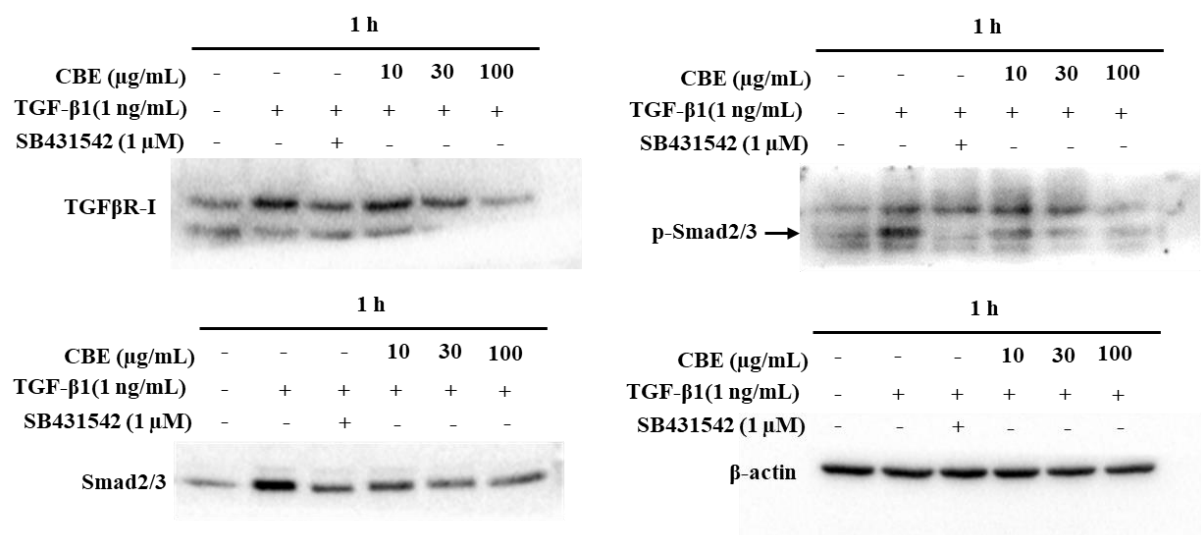

**Figure S6.** Original images of Western blot band intensities in Figure 6.

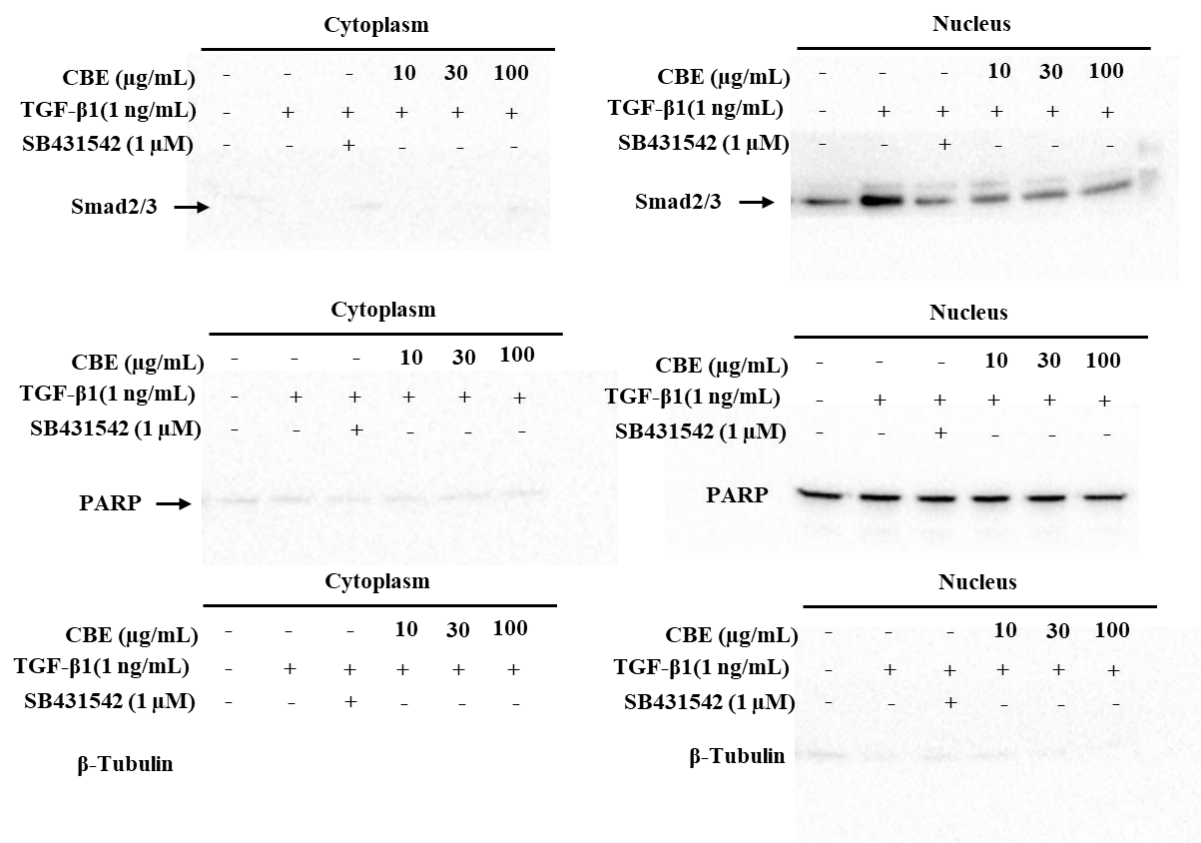

**Figure S7.** Original images of Western blot band intensities in Figure 7.

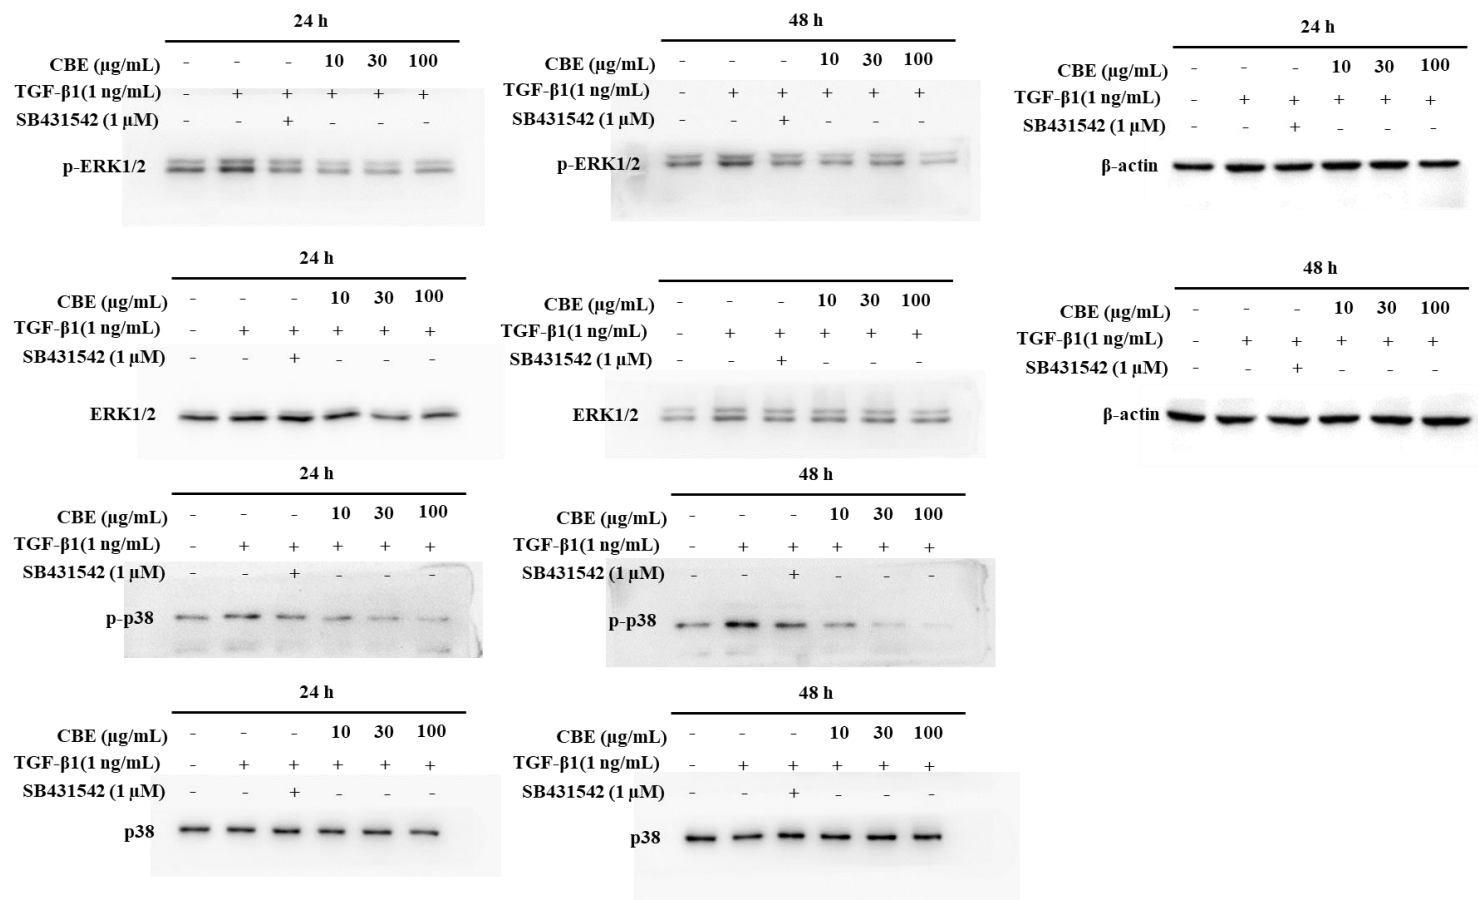

**Figure S8.** Original images of Western blot band intensities in Figure 8.

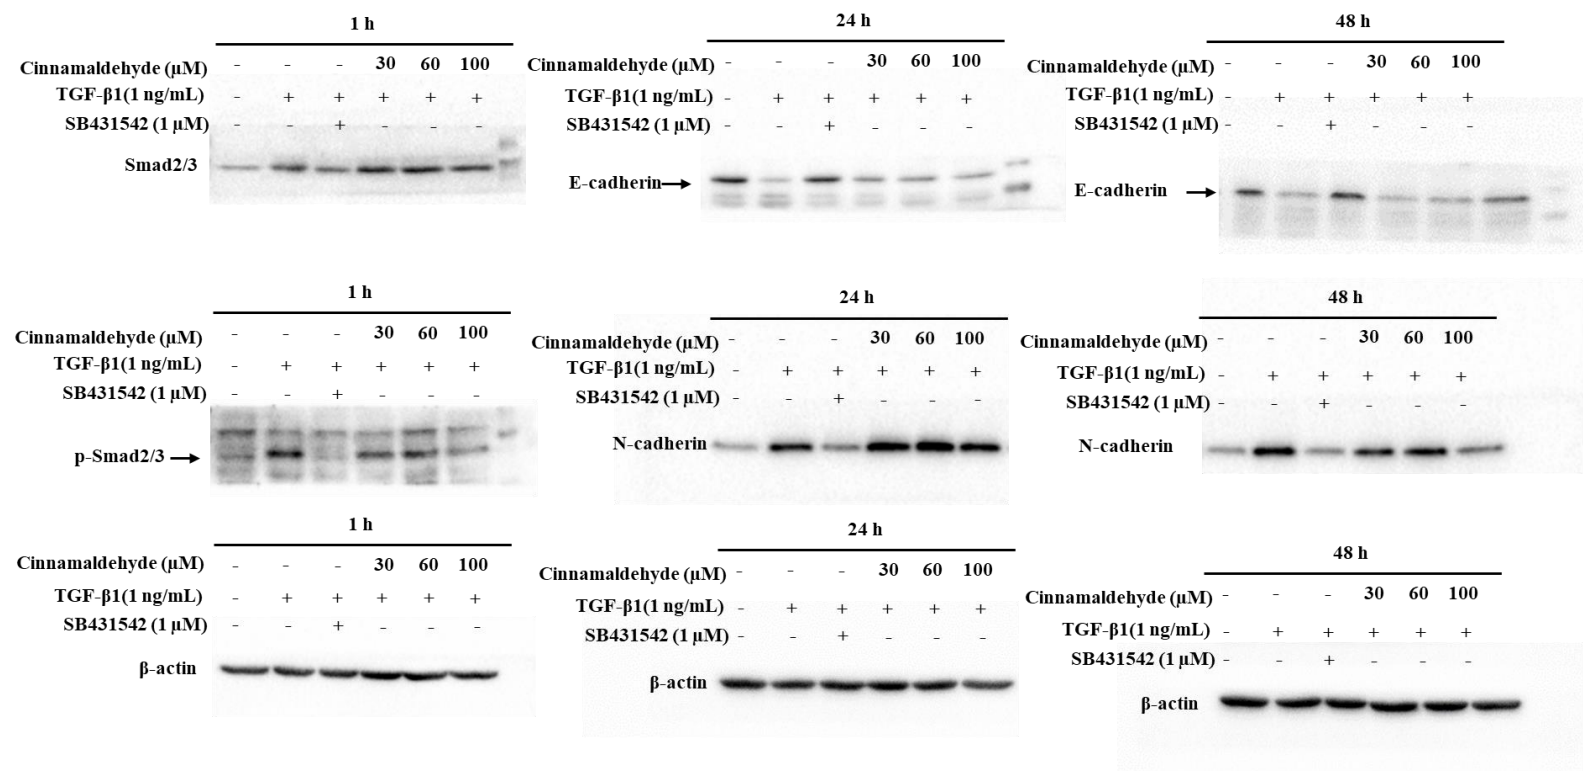

**Figure S9.** Original images of Western blot band intensities in Figure 9.
